# Supplementary material for: Evidence of and recommendations for non-pharmacological interventions for common geriatric conditions: the SENATOR-ONTOP systematic review protocol
Source: PubMed Central journal article supplement — BMJ Open. 2015 Jan 27;5(1):e007488. doi: 10.1136/bmjopen-2014-007488 (PMC4316555; doi:10.1136/bmjopen-2014-007488), 2015-01-27
Supplement: bmjopen-2014-007488.reviewer_comments.pdf [file bmjopen-2014-007488.reviewer_comments.pdf]

## PEER REVIEW HISTORY

BMJ Open publishes all reviews undertaken for accepted manuscripts. Reviewers are asked to complete a checklist review form (<http://bmjopen.bmj.com/site/about/resources/checklist.pdf>) and are provided with free text boxes to elaborate on their assessment. These free text comments are reproduced below.

## ARTICLE DETAILS

|                            |                                                                                                                                                    |
|----------------------------|----------------------------------------------------------------------------------------------------------------------------------------------------|
| <b>TITLE (PROVISIONAL)</b> | Evidence of and Recommendations for Non-Pharmacological Interventions for common geriatric conditions The SENATOR-ONTOP Systematic Review Protocol |
| <b>AUTHORS</b>             | Abraha, Iosief; Cruz-Jentoft, Alfonso; Soiza, Roy; O'Mahony, Denis; Cherubini, Antonio                                                             |

This article was not externally reviewed at BMJ Open. Protocols that have been independently assessed prior to submission to BMJ Open are usually fast-tracked to publication on the grounds that further substantial changes will not be possible. This independent assessment will usually be external, independent review for both a substantial grant award from a non-commercial or government funder and ethics approval.
